# Supplementary material
Source: PubMed Central journal article supplement (PMC2754571)
Supplement: NIHMS134925-supplement-supp.pdf [file NIHMS134925-supplement-supp.pdf]

## **Supplementary Information**

Evidence from a genetic fate-mapping study that stem cells  
refresh adult mammalian cardiomyocytes following injury

Patrick C.H. Hsieh<sup>1</sup>, Vincent F.M. Segers<sup>1</sup>, Michael E. Davis, Catherine MacGillivray,  
Joseph Gannon, Jeffery D. Molkentin, Jeffrey Robbins, Richard T. Lee.

<sup>1</sup> Both authors contributed equally to this paper.

## Supplementary Figure 1

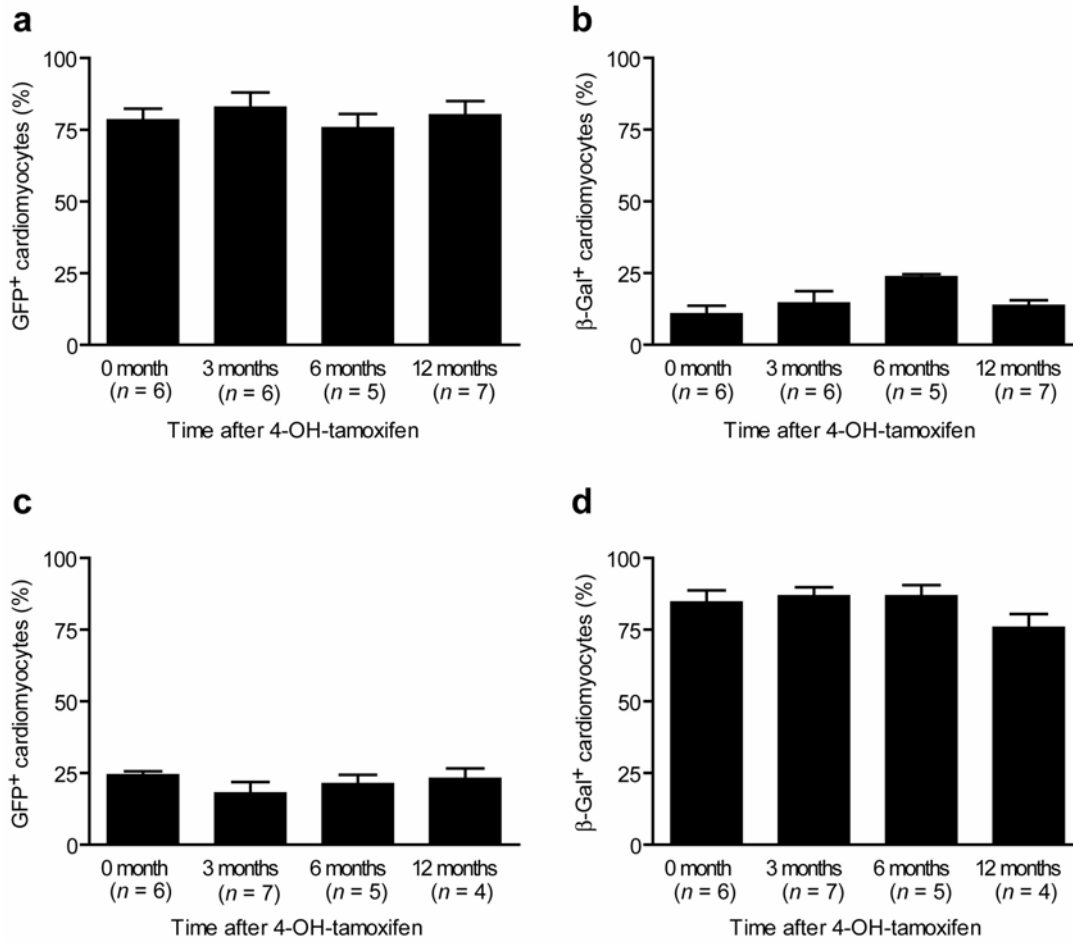

**Supplementary Figure 1.** Adult mammalian cardiomyocytes are not replaced by stem or progenitor cells during normal aging in right ventricle and atrium. **(a)** Percentage of GFP<sup>+</sup> cardiomyocytes during aging in right ventricle. At 0, 3, 6, and 12 months after the 4-OH-tamoxifen pulse, immunohistochemistry was used to detect GFP. Percentages of GFP<sup>+</sup> cardiomyocytes were 78.5±3.9% at 0 month (n=6), 83.0±5.1% at 3 months (n=6), 75.8±4.8% at 6 months (n=5), and 80.3±4.8% at 12 months (n=7) after the 4-OH-tamoxifen pulse. **(b)** Percentage of β-galactosidase<sup>+</sup> cardiomyocytes during aging in right ventricle were 10.9±2.8% at 0 month (n=6), 14.6±4.1% at 3 months (n=6), 23.8±0.8% at 6 months (n=5), and 13.8±1.7% at 12 months (n=7) after the 4-OH-tamoxifen pulse. **(c)** Percentage of GFP<sup>+</sup> cardiomyocytes during aging in atrium were 24.5±1.2% at 0 month (n=6), 18.1±3.7% at 3 months (n=7), 21.4±3.0% at 6 months (n=5), and 23.2±3.4% at 12 months (n=4) after the 4-OH-tamoxifen pulse. **(d)** Percentage of β-galactosidase<sup>+</sup> cardiomyocytes during aging in atrium were 84.8±4.0% at 0 month (n=6), 86.9±2.9% at 3 months (n=7), 86.8±3.7% at 6 months (n=5), and 75.9±4.6% at 12 months (n=4) after the 4-OH-Tamoxifen pulse. Mean±SEM.

## Supplementary Figure 2

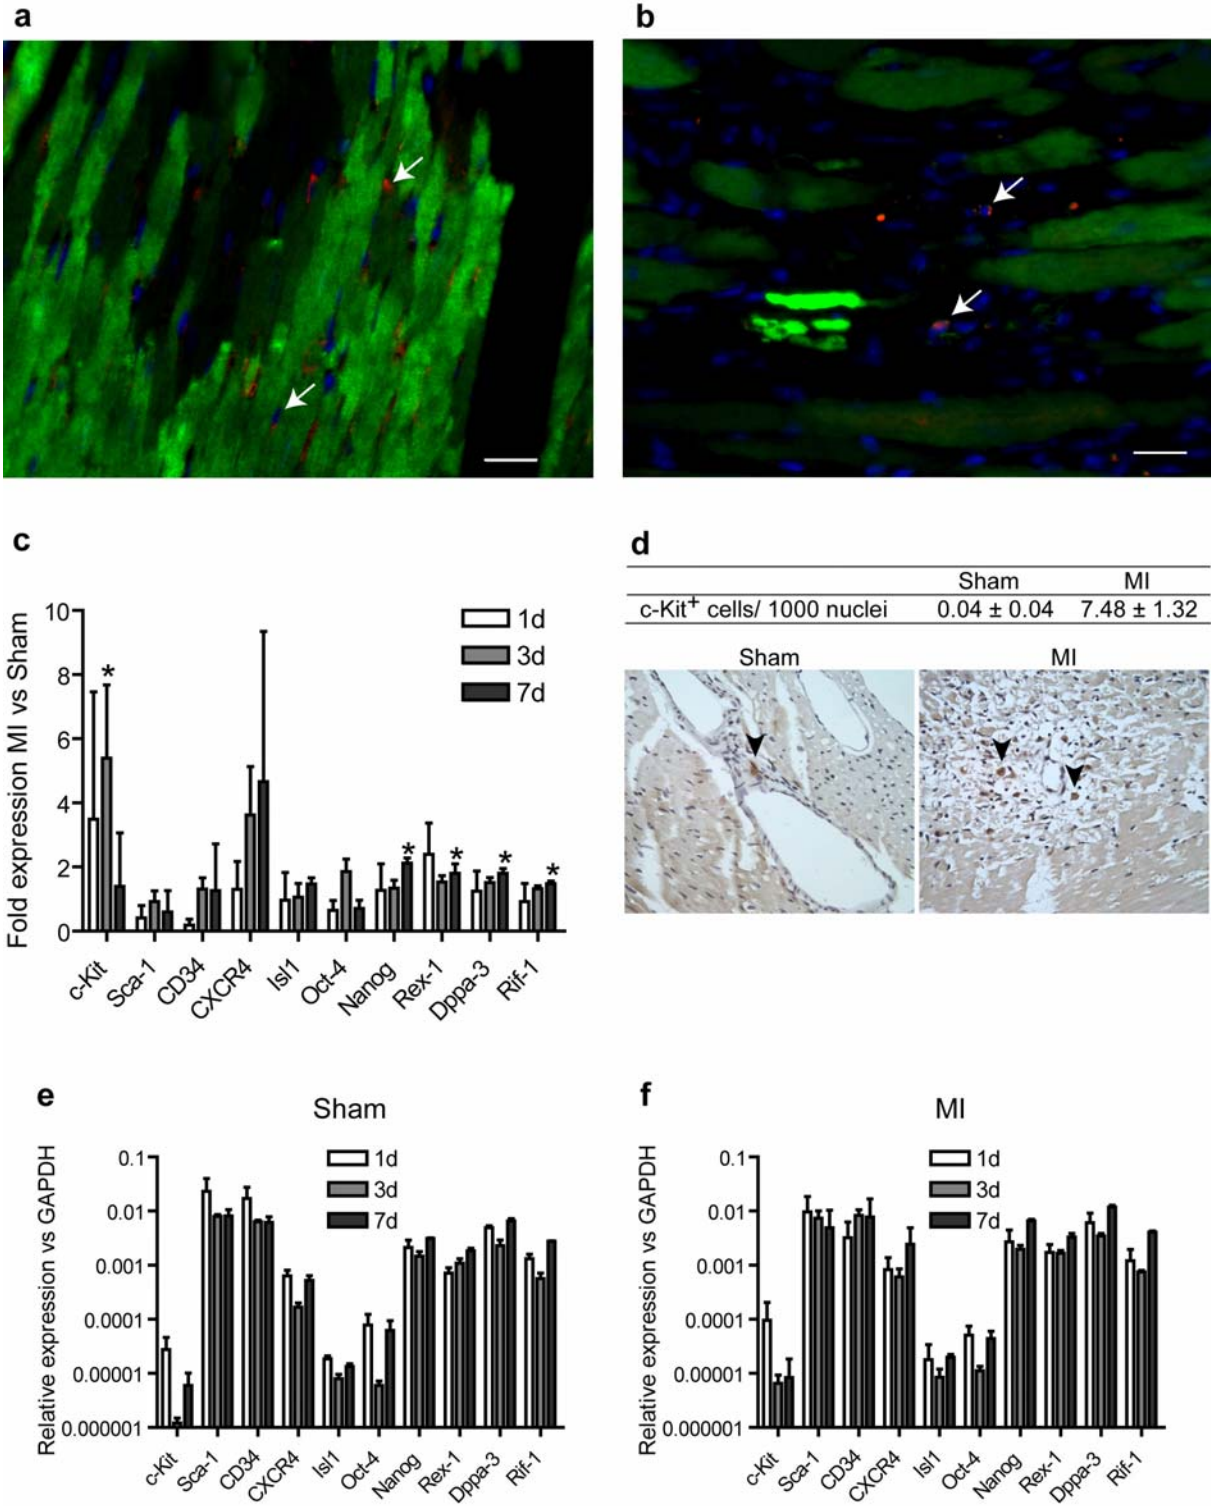

**Supplementary Figure 2.** Evidence for existence of c-Kit<sup>+</sup> stem cell pool in adult mouse myocardium. **(a)** Immunofluorescence staining of GFP (green) and Sca-1 (red) in normal myocardium. DAPI = blue. **(b)** Immunofluorescence staining of GFP (green) and c-Kit (red) in normal myocardium. **(c)** Quantitative real-time PCR of myocardium from sham operated animals and infarcted myocardium. mRNA expression of c-Kit increased 5.4 fold (+2.3 (upper SEM), -1.6(lower SEM), p=0.027, n=4) 3 days after myocardial infarction as compared to sham surgery. Other stem cells markers showed a small but significant increase at day 7 after myocardial infarction: Nanog (2.1 +0.2,-0.2 fold induction), Rex-1 (1.8 +0.3,-0.2), Dppa-3 (1.8 +0.2,-0.1), and Rif-1 (1.5 +0.1,-0.1). **(d)** Numbers of c-Kit positive cells per 1000 nuclei in sham and MI operated hearts. Arrows= brown c-Kit positive cells, immunohistochemistry. **(e)** Relative expression of different genes to GAPDH in sham operated mice. **(f)** Relative expression of different genes to GAPDH in the infarcted area. \* P<0.05. Mean±SEM.

### Supplementary Figure 3

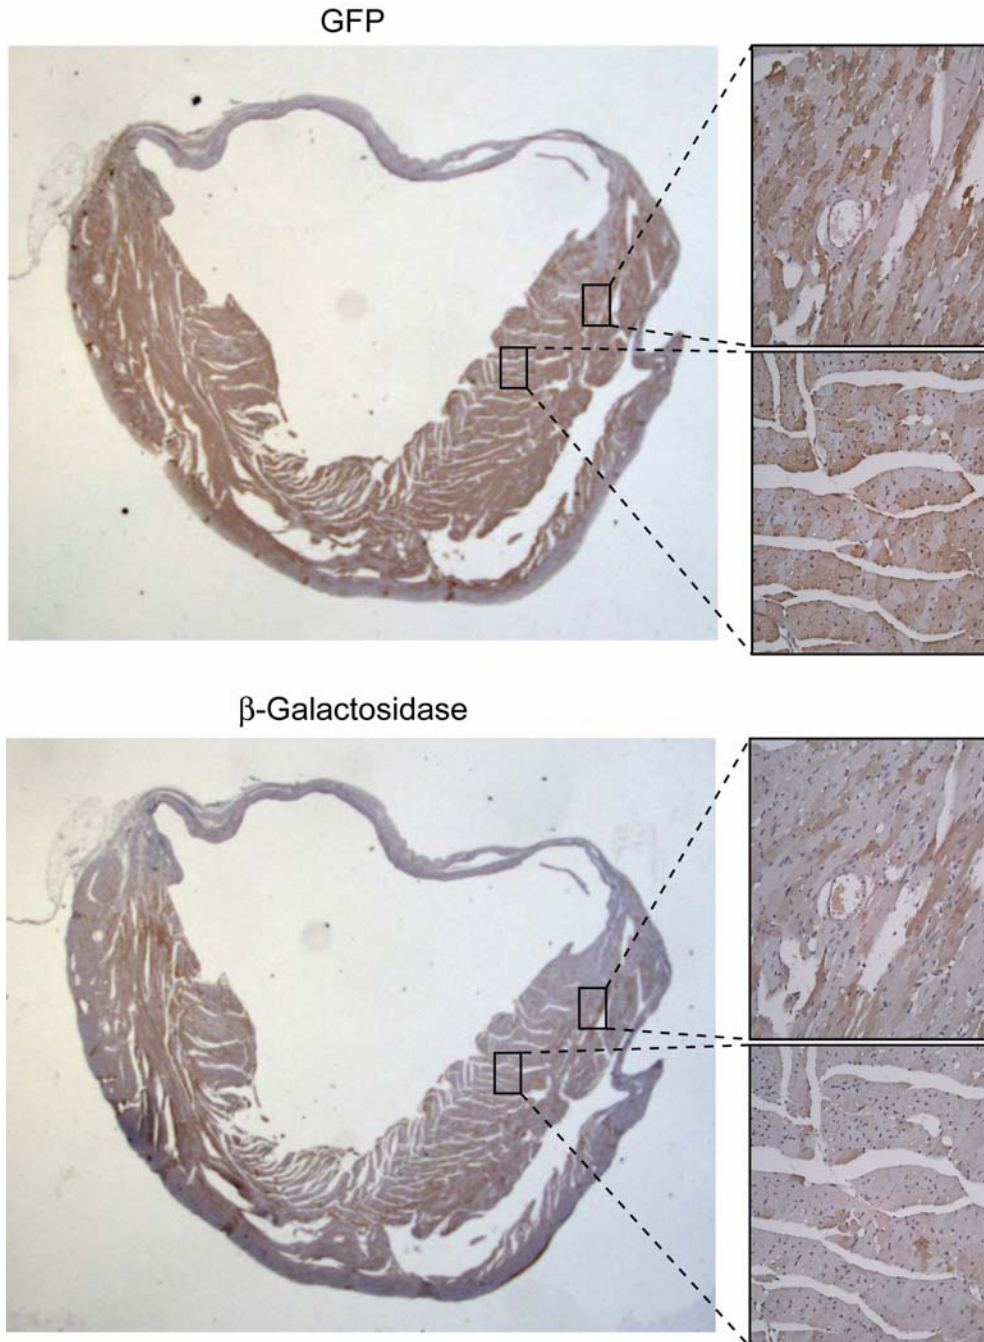

**Supplementary Figure 3.** Images of a representative myocardial infarction. Images at low magnification of GFP or  $\beta$ -galactosidase immunohistochemistry staining (brown) with hematoxylin counterstain. Inserts show border and remote areas; note that these are not adjacent sections.

## Supplementary Figure 4

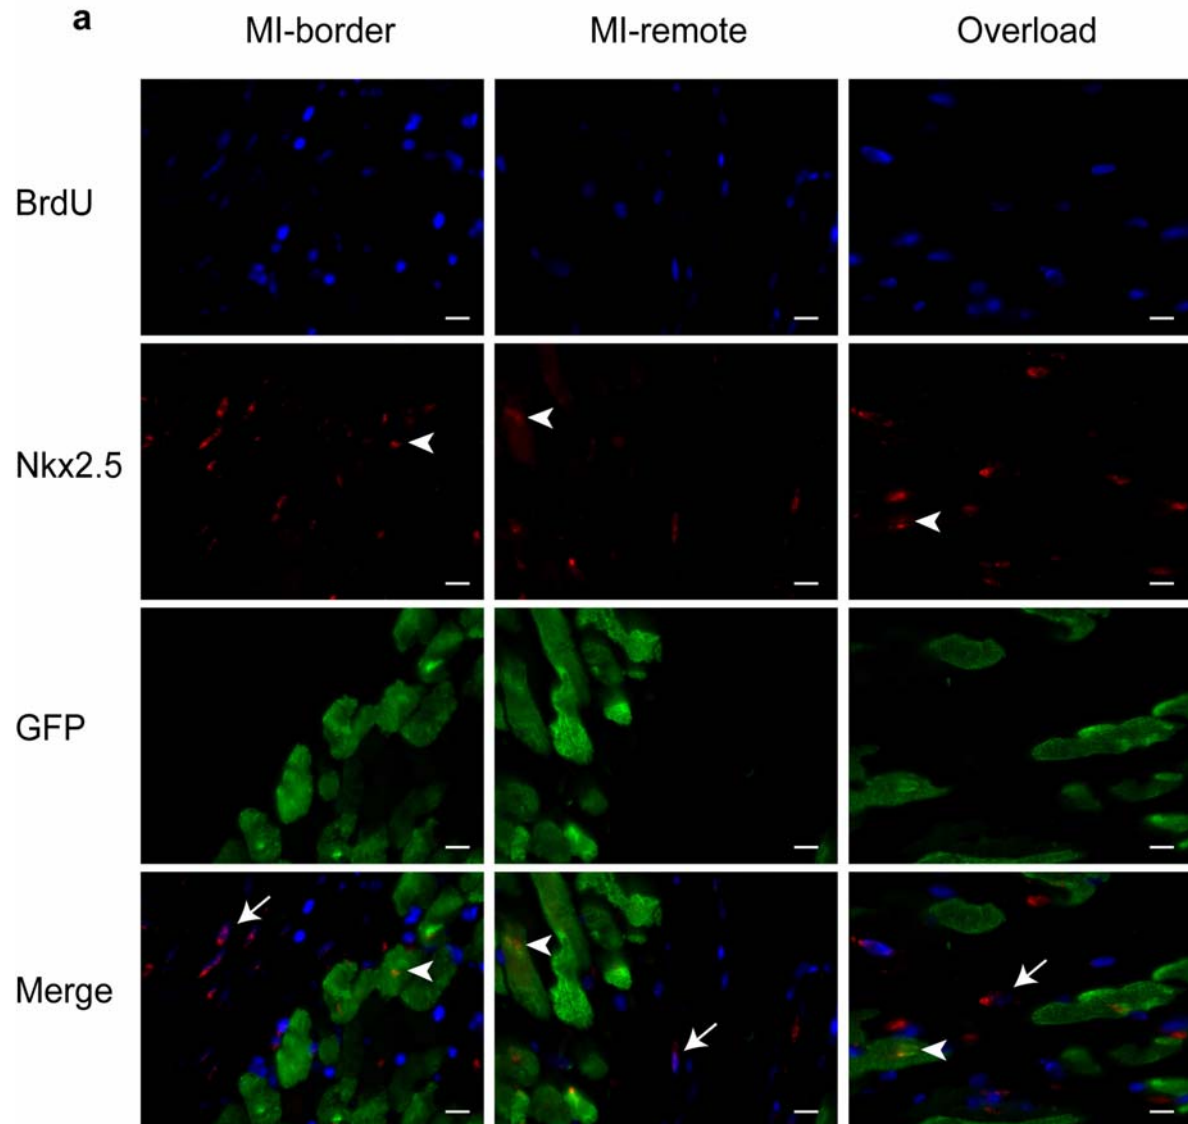

**b**

| (NKX2.5/BrdU <sup>+</sup> per 1000 Nkx2.5 <sup>+</sup> ) | 10days      | 30days     |
|----------------------------------------------------------|-------------|------------|
| Sham                                                     | 0.0 ± 0.0   | 0.0 ± 0.0  |
| MI-border                                                | 70.6 ± 20.0 | 34.9 ± 7.5 |
| MI-remote                                                | 4.2 ± 2.9   | 2.4 ± 2.4  |
| Overload                                                 | 2.4 ± 1.5   | 2.2 ± 0.8  |

**Supplementary Figure 4.** Stem or progenitor cells may contribute to the cardiomyocyte pool following myocardial injury. **(a)** BrdU/ Nkx2.5/ GFP staining for cardiomyocytes and/or precursors entering the cell cycle. Shown are representative images of triple staining (Nkx2.5, red; BrdU, blue; GFP, green) in sections from MerCreMer/ZEG mice 10 days after experimental MI or left ventricle overload. All BrdU<sup>+</sup> cardiomyocytes were GFP-negative. Arrows indicate BrdU<sup>+</sup>/Nkx2.5<sup>+</sup> cells. Arrowheads indicate Nkx2.5<sup>+</sup>/GFP<sup>+</sup> cardiomyocytes. **(b)** Summary of numbers of BrdU<sup>+</sup> Nkx2.5<sup>+</sup> nuclei per 1000 Nkx2.5<sup>+</sup> nuclei of hearts receiving sham operation, MI (both in the border and remote areas), or pressure overload. Scale bars=10 μm.

## Supplementary Figure 5

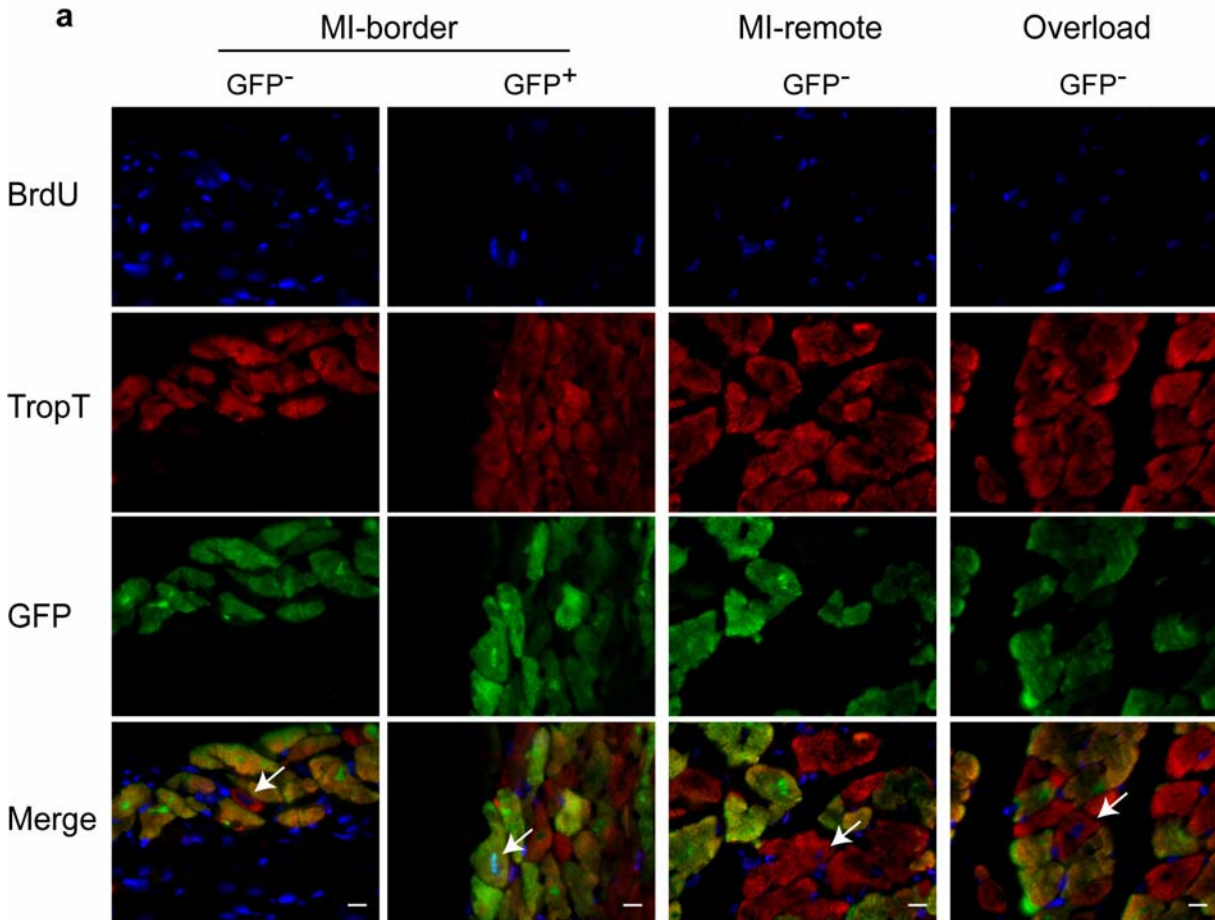

**b**

| (TropT/BrdU <sup>+</sup> per 1000 TropT <sup>+</sup> ) | GFP <sup>-</sup> | GFP <sup>+</sup>       |
|--------------------------------------------------------|------------------|------------------------|
| Sham (n=5)                                             | 0.0 ± 0.0        | 0.0 ± 0.0              |
| MI-border (n=5)                                        | 11.5 ± 1.7       | 0.7 ± 0.3 (P = 0.0002) |
| MI-remote (n=5)                                        | 2.1 ± 0.8        | 0.0 ± 0.0 (P = 0.047)  |
| Overload (n=5)                                         | 1.8 ± 0.8        | 0.0 ± 0.0 (P = 0.054)  |

**Supplementary Figure 5.** Cardiomyocytes positive for BrdU 30 days after surgery. **(a)** BrdU/ Troponin-T/ GFP staining for cardiomyocytes. Shown are representative images of triple staining (Troponin-T, red; BrdU, blue; GFP, green) in sections from MerCreMer/ZEG mice 30 days after experimental MI or left ventricle overload. Most BrdU<sup>+</sup> cardiomyocytes were GFP-negative, some BrdU<sup>+</sup>/Troponin-T<sup>+</sup>/GFP<sup>+</sup> were present in the border zone after myocardial infarction (note GFP expression in the



cardiomyocyte nucleus). Arrows indicate BrdU<sup>+</sup>/Troponin-T<sup>+</sup> cells. **(b)** Summary of numbers of BrdU<sup>+</sup>/Troponin-T<sup>+</sup> nuclei per 1000 Troponin-T<sup>+</sup> nuclei of hearts receiving sham operation, MI (both in the border and remote areas), or pressure overload. P values compare BrdU<sup>+</sup>/Troponin-T<sup>+</sup>/GFP<sup>+</sup> to BrdU<sup>+</sup>/Troponin-T<sup>+</sup>/GFP<sup>-</sup> cardiomyocytes. Scale bars=10 μm.

**Supplementary Table 1:** echocardiography data 2 weeks after aortic banding.

|          | Aortic banding ( <i>n</i> = 7) | Age-matched controls ( <i>n</i> = 6) |
|----------|--------------------------------|--------------------------------------|
| AWT (mm) | 1.62 ± 0.05                    | 0.84 ± 0.04*                         |
| PWT (mm) | 1.52 ± 0.06                    | 0.83 ± 0.04*                         |
| ESD (mm) | 1.31 ± 0.26                    | 1.13 ± 0.03                          |
| EDD (mm) | 2.86 ± 0.19                    | 2.48 ± 0.06                          |

\* P<0.0001.
